# Supplementary material for: Participatory Design of Nature-Based Solutions: Usability of Tools for Water Professionals
Source: MDPI journal article supplement (doi:10.3390/su14095562), 2022-05-05
Supplement: s1 [file s1]

| <b>WP</b> | <b>Role</b>                                      | <b>Case Study</b> | <b>Interview</b> | <b>Questionnaire</b> | <b>Workshops</b> |
|-----------|--------------------------------------------------|-------------------|------------------|----------------------|------------------|
| 1         | Landscape Designer                               | West Flanders     | ✓                | ✓                    | ✓                |
| 2         | Head of Environmental Modelling                  | The Culm          | ✓                |                      |                  |
| 3         | Project Manager - Climate Adaptation             | Aa of Weerijis    | ✓                | ✓                    | ✓                |
| 4         | Project Manager                                  | Porlock Vale      |                  | ✓                    | ✓                |
| 5         | Policy Advisor                                   | Laakbeek          |                  | ✓                    |                  |
| 6         | Project Manager                                  | Aa of Weerijis    |                  | ✓                    |                  |
| 7         | Project Manager                                  | Laakbeek          |                  | ✓                    | ✓                |
| 8         | Project Manager                                  | Liane             |                  | ✓                    | ✓                |
| 9         | Community Engagement Officer                     | Somerset          |                  | ✓                    | ✓                |
| 10        | Project Lead                                     | Somerset          |                  |                      | ✓                |
| 11        | Policy & Campaigns Manager                       | Somerset          |                  | ✓                    |                  |
| 12        | Climate Adaptation Manager                       | Somerset          | ✓                | ✓                    | ✓                |
| 13        | Project leader – Spatial Development             | Vlissingen        |                  | ✓                    | ✓                |
| 14        | Engagement manager                               | West Flanders     | ✓                |                      |                  |
| 15        | Project Manager                                  | West Flanders     |                  | ✓                    | ✓                |
| 16        | Flood & Coastal Risk Management Senior Advisor   | The Culm          | ✓                |                      |                  |
| 17        | Co-creation Specialist                           | The Culm          |                  |                      | ✓                |
| 18        | Project Manager                                  | Liane             |                  | ✓                    | ✓                |
| 19        | Project Manager                                  | Liane             | ✓                | ✓                    | ✓                |
| 20        | Intern - climate proofing small river catchments | Aa of Weerijis    |                  |                      | ✓                |
| 21        | Project Manager                                  | Somerset          |                  |                      | ✓                |
| 22        | Project Manager                                  | The Culm          | ✓                |                      |                  |
