# Supplementary material for: Participatory Design of Nature-Based Solutions: Usability of Tools for Water Professionals
Source: MDPI journal article supplement (doi:10.3390/su14095562), 2022-05-05
Supplement: s1 [file s1]

# Transition Tool

A Transition Tool is an instrument that supports the initiation and / or process of transition from existing water management situation to a stable envisaged climate adaptive water management practice. In this worksheet 3 tools can be submitted.

Knowledge Tool 1: *Fill in the name of the Tool*

**Aa of Weerijis**

## 1. What is the type of Transition Tool?

*Choose: Social media, E-Tools/virtual tool, GIS-based tools, Focus groups, Workshops, Questionnaire/Survey/Q methodology, Interviews, Meetings, Visual methods, Learning Alliances, Living Labs*

## 2. Can you give a short description of the tool?

*Max 10 sentences, if available add 1-3 supporting visuals (photo, diagram, drawing...) in tab 6*

### **3. What is the primary objective of the Transition Tool?**

*Choose: Improve system understanding; Identify indicators and criteria; Identify issues, preferences, management options; Communication of knowledge; Identify knowledge gaps; Obtain information from stakeholders; Creation of knowledge with stakeholder; Evaluation*

### **4. Can you give a short description of the objectives of using the tool?**

*Max 10 sentences.*

**5. What is the primary process stage in which the Transition Tool could be helpful?**

*E.g. Policy stages (agenda setting, formulation, decision-making, implementation, and evaluation) Project stages: (Actor Analysis, Motivation, Problem Definition, Project Definition, Action Plan, Implementation, Evaluation)*

**6. Can you describe how and in which (other) processes and stages the tool could be helpful?**

Max 10 sentences. E.g. Policy stages (agenda setting, formulation, decision-making, implementation, and evaluation) Project stages: (Actor Analysis, Motivation, Problem Definition, Project Definition, Action Plan, Implementation, Evaluation)

## 8. What are the strengths and weaknesses of the tool?

| Strengths | Weaknesses |
|-----------|------------|
|-----------|------------|

|  |  |
|--|--|
|  |  |
|--|--|

### 9. Can you provide practical information about the tool? (actual or envisaged)

|                                        |                                                                                     |
|----------------------------------------|-------------------------------------------------------------------------------------|
| <b><i>Time spent (total/week)</i></b>  | <i>Based on average FTE (full-time equivalent) / week. + amount of weeks spent.</i> |
| <b><i>Number of Staff involved</i></b> |                                                                                     |
| <b><i>Costs indicator</i></b>          | <i>Low, Medium, High</i>                                                            |

|                                           |                                                                           |
|-------------------------------------------|---------------------------------------------------------------------------|
| <b><i>Equipment needed</i></b>            |                                                                           |
| <b><i>Max. number of participants</i></b> |                                                                           |
| <b><i>Other relevant information</i></b>  |                                                                           |
| <b><i>Specific practical tips</i></b>     |                                                                           |
| <b><i>Source</i></b>                      | <i>Name source of tool and if available a link provide a link to URL.</i> |

Transition Tool 2: *Fill in the name of the Tool*

**Aa of Weerijis**

### **1. What is the type of Transition Tool?**

*Choose: Social media, E-Tools/virtual tool, GIS-based tools, Focus groups, Workshops, Questionnaire/Survey/Q methodology, Interviews, Meetings, Visual methods, Learning Alliances, Living Labs*

### **2. Can you give a short description of the tool?**

*Max 10 sentences, if available add 1-3 supporting visuals (photo, diagram, drawing...) in tab 6*

### 3. What is the primary objective of the Transition Tool?

*Choose: Improve system understanding; Identify indicators and criteria; Identify issues, preferences, management options; Communication of knowledge; Identify knowledge gaps; Obtain information from stakeholders; Creation of knowledge with stakeholder; Evaluation*

### 4. Can you give a short description of the objectives of using the tool?

*Max 10 sentences.*

### 5. What is the primary process stage in which the Transition Tool could be helpful?



*E.g. Policy stages (agenda setting, formulation, decision-making, implementation, and evaluation) Project stages: (Actor Analysis, Motivation, Problem Definition, Project Definition, Action Plan, Implementation, Evaluation)*

## 6. Can you describe how and in which (other) processes and stages the tool could be helpful?

*Max 10 sentences. E.g. Policy stages (agenda setting, formulation, decision-making, implementation, and evaluation) Project stages: (Actor Analysis, Motivation, Problem Definition, Project Definition, Action Plan, Implementation, Evaluation)*

## 8. What are the strengths and weaknesses of the tool?

| Strengths | Weaknesses |
|-----------|------------|
|-----------|------------|

|  |  |
|--|--|
|  |  |
|--|--|

### 9. Can you provide practical information about the tool? (actual or envisaged)

|                                        |                                                                                     |
|----------------------------------------|-------------------------------------------------------------------------------------|
| <b><i>Time spent (total/week)</i></b>  | <i>Based on average FTE (full-time equivalent) / week. + amount of weeks spent.</i> |
| <b><i>Number of Staff involved</i></b> |                                                                                     |
| <b><i>Costs indicator</i></b>          | <i>Low, Medium, High</i>                                                            |

|                                           |                                                                           |
|-------------------------------------------|---------------------------------------------------------------------------|
| <b><i>Equipment needed</i></b>            |                                                                           |
| <b><i>Max. number of participants</i></b> |                                                                           |
| <b><i>Other relevant information</i></b>  |                                                                           |
| <b><i>Specific practical tips</i></b>     |                                                                           |
| <b><i>Source</i></b>                      | <i>Name source of tool and if available a link provide a link to URL.</i> |

Transition Tool 3: *Fill in the name of the Tool*

**Aa of Weerijis**

### **1. What is the type of Transition Tool?**

*Choose: Social media, E-Tools/virtual tool, GIS-based tools, Focus groups, Workshops, Questionnaire/Survey/Q methodology, Interviews, Meetings, Visual methods, Learning Alliances, Living Labs*

### **2. Can you give a short description of the tool?**

*Max 10 sentences, if available add 1-3 supporting visuals (photo, diagram, drawing...) in tab 6*

### **3. What is the primary objective of the Transition Tool?**

*Choose: Improve system understanding; Identify indicators and criteria; Identify issues, preferences, management options; Communication of knowledge; Identify knowledge gaps; Obtain information from stakeholders; Creation of knowledge with stakeholder; Evaluation*

### **4. Can you give a short description of the objectives of using the tool?**

*Max 10 sentences.*

**5. What is the primary process stage in which the Transition Tool could be helpful?**

*E.g. Policy stages (agenda setting, formulation, decision-making, implementation, and evaluation) Project stages: (Actor Analysis, Motivation, Problem Definition, Project Definition, Action Plan, Implementation, Evaluation)*

**6. Can you describe how and in which (other) processes and stages the tool could be helpful?**

Max 10 sentences. E.g. Policy stages (agenda setting, formulation, decision-making, implementation, and evaluation) Project stages: (Actor Analysis, Motivation, Problem Definition, Project Definition, Action Plan, Implementation, Evaluation)

## 8. What are the strengths and weaknesses of the tool?

| Strengths | Weaknesses |
|-----------|------------|
|           |            |

### 9. Can you provide practical information about the tool? (actual or envisaged)

|                                           |                                                                                     |
|-------------------------------------------|-------------------------------------------------------------------------------------|
| <b><i>Time spent (total/week)</i></b>     | <i>Based on average FTE (full-time equivalent) / week. + amount of weeks spent.</i> |
| <b><i>Number of Staff involved</i></b>    |                                                                                     |
| <b><i>Costs indicator</i></b>             | <i>Low, Medium, High</i>                                                            |
| <b><i>Equipment needed</i></b>            |                                                                                     |
| <b><i>Max. number of participants</i></b> |                                                                                     |
| <b><i>Other relevant information</i></b>  |                                                                                     |



|                                       |                                                                           |
|---------------------------------------|---------------------------------------------------------------------------|
| <b><i>Specific practical tips</i></b> |                                                                           |
| <b><i>Source</i></b>                  | <i>Name source of tool and if available a link provide a link to URL.</i> |
